# Supplementary material
Source: ML conference proceedings conference paper supplement (https://proceedings.neurips.cc/paper_files/paper/2019/hash/8804f94e16ba5b680e239a554a08f7d2-Abstract.html)
Supplement: Supplementary file [file 8804f94e16ba5b680e239a554a08f7d2-Supplemental.zip]

## Supplementary Material

### 0.1 Style Transfer Cases

| Negative -> Positive (Yelp) |                                                                                                |
|-----------------------------|------------------------------------------------------------------------------------------------|
| Input:                      | it is n't terrible , but it is n't very good either .                                          |
| CrossAlign:                 | it is always great , but it is always very good .                                              |
| MultiDec:                   | it is n't delicious but , it is not very well good .                                           |
| StyleEmb:                   | it is n't terrible , but it is n't very good either .                                          |
| CycleRL:                    | it is n't recommend , but it is n't very great variations .                                    |
| BackTrans:                  | she was very nice , but the service is great .                                                 |
| RuleBase:                   | it is n't oh so good ! but it is                                                               |
| DelRetrGen:                 | it is n't great but it is reasonably priced .                                                  |
| UnsupMT:                    | it is excellent , but it is good too .                                                         |
| Ours:                       | <b>it is excellent , and it is very good delicious .</b>                                       |
| Human:                      | it is n't perfect , but it is very good .                                                      |
| Input:                      | the food was so-so and very over priced for what you get .                                     |
| CrossAlign:                 | the food was fantastic and very very nice for what you .                                       |
| MultiDec:                   | the food was low up and over great , see you need .                                            |
| StyleEmb:                   | the food was so-so and very over priced for what you get .                                     |
| CycleRL:                    | the food was so-so and very over priced for what great qualities .                             |
| BackTrans:                  | the food is delicious and the staff are very good for me .                                     |
| RuleBase:                   | the food was so-so and very over priced for what you get just right .                          |
| DelRetrGen:                 | the service is fantastic and the food was so-so and the food is very priced for what you get . |
| UnsupMT:                    | the food was decent and very perfectly priced for what you get .                               |
| Ours:                       | <b>the food was great and very perfectly priced for what you get .</b>                         |
| Human:                      | the food was great and perfectly priced                                                        |
| Input:                      | i guess she was n't happy that we were asking the prices .                                     |
| CrossAlign:                 | i guess she was n't great and we were pretty good .                                            |
| MultiDec:                   | i would maybe worked that i been taking they were but very helpful .                           |
| StyleEmb:                   | i guess she was n't happy that we were n't more service .                                      |
| CycleRL:                    | i guess she was n't happy that we were asking great qualities .                                |
| BackTrans:                  | i think i will be back to go here , we love it .                                               |
| RuleBase:                   | i very reasonable and happy that we were asking the prices .                                   |
| DelRetrGen:                 | fast , fast , happy that we were asking , and the prices were great .                          |
| UnsupMT:                    | i think she was happy that we are attentive the prices .                                       |
| Ours:                       | <b>i guess she was happy that we were asking the prices .</b>                                  |
| Human:                      | she was happy that we were asking for the prices .                                             |
| Positive -> Negative (Yelp) |                                                                                                |
| Input:                      | the service was top notch and the food was a bit of heaven .                                   |
| CrossAlign:                 | the service was top notch and the room was very expensive on me .                              |
| MultiDec:                   | the service was top and the food was a bit of this plate .                                     |
| StyleEmb:                   | the service was top notch and the food was a bit of heaven .                                   |
| CycleRL:                    | the service was top that awful and the dinner was not great existent .                         |
| BackTrans:                  | the service is horrible and the food is not very good .                                        |
| RuleBase:                   | slow the food was a bit of                                                                     |
| DelRetrGen:                 | the food was a bit of weird .                                                                  |
| UnsupMT:                    | the service was lacking and the food was a bit of sick .                                       |
| Ours:                       | <b>the service was bad and the food was a bit of sick .</b>                                    |
| Human:                      | the service was bad and the food was hellish                                                   |
| Input:                      | food is always amazing no matter what i order .                                                |
| CrossAlign:                 | food is does not sense about what i did n't care .                                             |
| MultiDec:                   | food is always better no do so you have .                                                      |
| StyleEmb:                   | food is always amazing no matter what i order .                                                |
| CycleRL:                    | food is always no amazing matter what i order .                                                |
| BackTrans:                  | really awful and chocolate service .                                                           |
| RuleBase:                   | awful no matter what i order .                                                                 |
| DelRetrGen:                 | no matter what i repeated order .                                                              |

|                                         |                                                                                   |
|-----------------------------------------|-----------------------------------------------------------------------------------|
| UnsupMT:                                | food is always horrible no clue what i order .                                    |
| Ours:                                   | <b>food is awful no matter what i order .</b>                                     |
| Human:                                  | the food is always terrible when i order here .                                   |
| Input:                                  | i 'll definitely go back here again .                                             |
| CrossAlign:                             | i 'll not go back here again again again .                                        |
| MultiDec:                               | i 'll go definitely back here again .                                             |
| StyleEmb:                               | i 'll definitely go back here again .                                             |
| CycleRL:                                | i 'll great judgement back again .                                                |
| BackTrans:                              | i am i 've not .                                                                  |
| RuleBase:                               | rude staff and terrible here again .                                              |
| DelRetrGen:                             | i refuse to go here again .                                                       |
| UnsupMT:                                | i 'll probably not go back here again .                                           |
| Ours:                                   | <b>i 'll never go back here again .</b>                                           |
| Human:                                  | i wo n't go back there .                                                          |
| <b>Negative -&gt; Positive (Amazon)</b> |                                                                                   |
| Input:                                  | this is not worth the money and the brand name is misleading .                    |
| CrossAlign:                             | this is not the best and the best is not great .                                  |
| MultiDec:                               | this is not worth the money and this pan , at amazon .                            |
| StyleEmb:                               | this is not worth the money and the brand name is the price .                     |
| CycleRL:                                | this is not worth the money and the brand name minimizes rental .                 |
| BackTrans:                              | this is not a great biased , and the de de .                                      |
| RuleBase:                               | you can not beat the price and the brand name is misleading .                     |
| DelRetrGen:                             | well worth the money and the brand name is misleading .                           |
| UnsupMT:                                | this is definitely worth the money and the brand name is illustrated .            |
| Ours:                                   | <b>this is worth the money and the brand name is great .</b>                      |
| Human:                                  | this is worth the money and the brand name is awesome .                           |
| Input:                                  | i could barely get through it they taste so nasty .                               |
| CrossAlign:                             | i ve had it for my husband and they are .                                         |
| MultiDec:                               | i could do take it all them so easy so .                                          |
| StyleEmb:                               | i could smell of smell of it right and helps .                                    |
| CycleRL:                                | i could barely get through it they taste so nasty .                               |
| BackTrans:                              | i can t be happy with this product .                                              |
| RuleBase:                               | beautifully through it they taste so nasty .                                      |
| DelRetrGen:                             | i have used it through and it is very sharp and it was very nasty .               |
| UnsupMT:                                | i can perfect get through it they taste so delicious .                            |
| Ours:                                   | <b>i totally noticed they taste so good .</b>                                     |
| Human:                                  | i loved it because they taste so great .                                          |
| Input:                                  | i will never again purchase another game where this is a requirement .            |
| CrossAlign:                             | i ve never had this for my wife and it s a num_extend                             |
| MultiDec:                               | i will never use these out of this , is the best .                                |
| StyleEmb:                               | i will never purchase again another game you ll put a bad .                       |
| CycleRL:                                | i will never again purchase another game where this is dangerously floured .      |
| BackTrans:                              | i can t use it for my phone , but it s une .                                      |
| RuleBase:                               | i will never again purchase measuring cup this is a requirement .                 |
| DelRetrGen:                             | i will never again purchase another one in the game where this is a requirement . |
| UnsupMT:                                | i will definitely again purchase another pan where this is a cannot .             |
| Ours:                                   | <b>i will purchase this game again where it is a requirement .</b>                |
| Human:                                  | i will purchase this type of game again .                                         |
| <b>Positive -&gt; Negative (Amazon)</b> |                                                                                   |
| Input:                                  | i would definitely recommend this for a cute case .                               |
| CrossAlign:                             | i would not recommend this for a long time .                                      |
| MultiDec:                               | i would definitely recommend this for a bra does it .                             |
| StyleEmb:                               | i would definitely recommend this for a cute case .                               |
| CycleRL:                                | i wish of this product the promises online terrible .                             |
| BackTrans:                              | midnight i have to get this product for a un .                                    |
| RuleBase:                               | skip this one for a cute case .                                                   |
| DelRetrGen:                             | i would not recommend this for a cute case .                                      |
| UnsupMT:                                | i would definitely not recommend this for a cute case .                           |

|                                          |                                                                                  |
|------------------------------------------|----------------------------------------------------------------------------------|
| Ours:                                    | <b>i would definitely not recommend this for a cute case .</b>                   |
| Human:                                   | i would definitely not recommend this for a cute case .                          |
| Input:                                   | very nice unit , easy to assemble and operate .                                  |
| CrossAlign:                              | very good , but you are very happy with .                                        |
| MultiDec:                                | very nice unit , easy to wear and tastes .                                       |
| StyleEmb:                                | very good in case , it feels excellent results .                                 |
| CycleRL:                                 | very clip , did to [UNK] deliver and punch .                                     |
| BackTrans:                               | no texture , and et t have to get the hair .                                     |
| RuleBase:                                | very nice unit didn t work at assemble and operate .                             |
| DelRetrGen:                              | very nice unit and was looking forward to this operate .                         |
| UnsupMT:                                 | very nice unit , impossible to assemble and operate .                            |
| Ours:                                    | <b>very terrible unit , hard to assemble and boot .</b>                          |
| Human:                                   | very ugly unit , hard to assemble and difficult to operate .                     |
| Input:                                   | i would n t trade them but this is a great knife for the price .                 |
| CrossAlign:                              | i don t know it s just like the same for a few days .                            |
| MultiDec:                                | i can t return it and this product a great game for the price .                  |
| StyleEmb:                                | i would n t believe it to say the last such a decent use price .                 |
| CycleRL:                                 | i [UNK] t trade them but this is a great glitch containing [UNK] smoking .       |
| BackTrans:                               | i don t buy this product , but it s not a le .                                   |
| RuleBase:                                | i i wish i had n them but price .                                                |
| DelRetrGen:                              | i would n t trade them or recommend this knife for the price .                   |
| UnsupMT:                                 | i would n t trade them but this is a horrible toy for the price .                |
| Ours:                                    | <b>i would trade them but here it is a horrible knife for the price .</b>        |
| Human:                                   | i would trade them because this is a horrible knife for the price .              |
| <b>Factual -&gt; Romantic (Captions)</b> |                                                                                  |
| Input:                                   | a man and woman against a pink background smile .                                |
| CrossAlign:                              | a man in a red shirt is running on a beach .                                     |
| MultiDec:                                | a man and woman on a red crowd looks .                                           |
| StyleEmb:                                | a man and a woman smile and talk with one .                                      |
| CycleRL:                                 | a man and woman against a pink background smile .                                |
| BackTrans:                               | a man and woman against a pink background smile .                                |
| RuleBase:                                | a man and woman against a pink background smile loved .                          |
| DelRetrGen:                              | a man and woman watches a pink street to show his lover .                        |
| UnsupMT:                                 | a man and woman crossing a kiss together dreaming of love .                      |
| Ours:                                    | <b>a man and a woman hug with a pink smile on face .</b>                         |
| Human:                                   | a bearded man and a woman in a dress holding a cup with a smiley face .          |
| <b>Factual -&gt; Humorous (Captions)</b> |                                                                                  |
| Input:                                   | a young man dances by a fountain .                                               |
| CrossAlign:                              | a man is running on a beach to find the space .                                  |
| MultiDec:                                | a young man stands next like a car .                                             |
| StyleEmb:                                | a young man dances along an inflatable fountain .                                |
| CycleRL:                                 | a man dances by a fountain .                                                     |
| BackTrans:                               | a young man dances by a fountain .                                               |
| RuleBase:                                | a young man dances by a fountain deadly .                                        |
| DelRetrGen:                              | a young man is running off for supremacy .                                       |
| UnsupMT:                                 | a young man sits by a fountain like a monkey with a smiley face .                |
| Ours:                                    | <b>a young man dances by a fountain in a yellow jacket , playfully playing .</b> |
| Human:                                   | a boy in dark clothing near fountain water spout trying play with water .        |

## 0.2 Transfer Degree Control Cases

|                                |                                                                 |
|--------------------------------|-----------------------------------------------------------------|
| <b>Negative -&gt; Positive</b> |                                                                 |
| Source:                        | it is n't terrible , but it is n't very good either .           |
| Human:                         | it is n't perfect , but it is very good .                       |
| $w = 1.0$ :                    | it is n't terrible , but it is n't very good either .           |
| $w = 2.0$ :                    | it is n't terrible , but it is n't very good delicious either . |
| $w = 3.0$ :                    | it is n't terrible , but it is very good delicious either .     |

|             |                                                                                    |
|-------------|------------------------------------------------------------------------------------|
| $w = 4.0$ : | it is n't terrible , but it is very good and delicious .                           |
| $w = 5.0$ : | it is n't terrible , but it is very good and delicious appetizer .                 |
| $w = 6.0$ : | it is excellent , and it is very good and delicious well .                         |
| Source:     | there is definitely not enough room in that part of the venue .                    |
| Human:      | there is so much room in that part of the venue                                    |
| $w = 1.0$ : | there is definitely not enough room in that part of the venue .                    |
| $w = 2.0$ : | there is definitely enough amazing room in that part of the venue .                |
| $w = 3.0$ : | there is definitely amazing enough room in that part of the venue .                |
| $w = 4.0$ : | there is definitely amazing enough room in that amazing part .                     |
| $w = 5.0$ : | there is definitely amazing enough room in that well of the hidden gem .           |
| $w = 6.0$ : | there is definitely amazing nice room , and the part of amazing phenomenal !       |
| Source:     | definitely disappointed that i could not use my birthday gift !                    |
| Human:      | definitely not disappointed that i could use my birthday gift !                    |
| $w = 1.0$ : | definitely disappointed that i could not use my birthday gift they .               |
| $w = 2.0$ : | definitely disappointed that i could use not got my birthday gift questions !      |
| $w = 3.0$ : | definitely liked you and i could use my birthday gift easy that !                  |
| $w = 4.0$ : | definitely liked you and i 'll seen my birthday gift both a message !              |
| $w = 5.0$ : | definitely recommend and i could enjoys all my birthday gift free salsa !          |
| $w = 6.0$ : | definitely recommend and i 'll answered all my birthday gift from friend !         |
| Source:     | we sit down and we got some really slow and lazy service .                         |
| Human:      | the service was quick and responsive                                               |
| $w = 1.0$ : | we sit down and we got some really slow and lazy service .                         |
| $w = 2.0$ : | we sit down and we got some really nice slow and lazy service .                    |
| $w = 3.0$ : | we sit down and we got some really nice fast and decorated service .               |
| $w = 4.0$ : | we sit down and we got really some great quick and organized service .             |
| $w = 5.0$ : | we sit down and we got some really quick great fly and decent service .            |
| $w = 6.0$ : | we enjoy nice brunch and we got really quick friendly service and have great fun . |
| Source:     | there chips are ok , but their salsa is really bland .                             |
| Human:      | these chips are okay but their salsa is really tasty                               |
| $w = 1.0$ : | there chips are ok , but their salsa is really bland and amazing .                 |
| $w = 2.0$ : | there chips are ok , but their salsa is really nice and tasty .                    |
| $w = 3.0$ : | there chips are ok , but their salsa is really nice tasty !                        |
| $w = 4.0$ : | there chips are ok , their salsa is amazing really enjoy !                         |
| $w = 5.0$ : | there are ok chips forward to their salsa and is amazing great !                   |
| $w = 6.0$ : | there are nice chips , their salsa is amazing great !                              |
| Source:     | the wine was very average and the food was even less .                             |
| Human:      | the wine was above average and the food was even better                            |
| $w = 1.0$ : | the wine was very average and the food was even less than needs .                  |
| $w = 2.0$ : | the wine was very nice and the food was even less dining .                         |
| $w = 3.0$ : | the wine was very nice and the food was easy even above business .                 |
| $w = 4.0$ : | the wine was very amazing and the food was above happy .                           |
| $w = 5.0$ : | the wine was very amazing and the food is large always fun .                       |
| $w = 6.0$ : | great wine is very amazing and the food always reasonable .                        |
| Source:     | the burgers were over cooked to the point the meat was crunchy .                   |
| Human:      | the burgers were cooked perfectly and the meat was juicy                           |
| $w = 1.0$ : | the burgers were over cooked to the point the meat was crunchy .                   |
| $w = 2.0$ : | the burgers were over cooked to the point the meat was crunchy perfect .           |
| $w = 3.0$ : | the burgers were over cooked to the point the meat was crunchy perfect .           |
| $w = 4.0$ : | the burgers were fantastic from top to the the point meat was great crunchy .      |
| $w = 5.0$ : | the burgers were fantastic from always the point the service is perfect crunchy .  |
| $w = 6.0$ : | the burgers were fantastic from always the meat is perfectly .                     |
| Source:     | said we could n't sit at the table if we were n't ordering dinner .                |
| Human:      | they said we could sit at the table with no hesitation                             |
| $w = 1.0$ : | said we could n't sit at the table if we were n't ordering dinner .                |
| $w = 2.0$ : | said we could n't sit at the table if we were ordering a dinner !                  |
| $w = 3.0$ : | said we nice as the table of the brunch if we were n't ordering !                  |
| $w = 4.0$ : | said we lovely as the table for the brunch , we were n't ordering !                |

w = 5.0: said we lovely as the table for brunch from the dinner we were always !  
w = 6.0: said we lovely as the table for brunch from the dinner we were always !

---

**Positive -> Negative**

---

Source: really good service and food .

Human: the service was bad

w = 1.0: really good service and food .

w = 2.0: very good service and food .

w = 3.0: very good food but service is terrible !

w = 4.0: not good food and service is terrible !

w = 5.0: bad service and food !

w = 6.0: very terrible service and food !

---

Source: they were so helpful , kind , and reasonably priced .

Human: they should 've been more helpful , kind , and reasonably priced .

w = 1.0: they were so helpful , kind , and reasonably priced , slow .

w = 2.0: they were so helpful , kind , and priced were bad .

w = 3.0: they were so helpful , kind , and noticed priced no reasonably .

w = 4.0: they were so only rude , although , one were sort about fries .

w = 5.0: they were so only rude , although , took not minutes they nasty .

w = 6.0: they were so only rude , nothing but bad was noticed .

---

Source: the atmosphere was fun and the staff treats you well .

Human: the atmosphere was lame and the staff treats you like dirt

w = 1.0: the atmosphere was fun and the staff shut you totally said the well .

w = 2.0: the atmosphere was not fun and the staff said they totally let it well .

w = 3.0: the atmosphere was not fun and the staff said it was wrong .

w = 4.0: the atmosphere was not fun and the toilet was bad .

w = 5.0: the atmosphere was not that but the staff was bad and wrong .

w = 6.0: the atmosphere was trash and the staff bad !

---

Source: i also love their convenient location right off of scottsdale road .

Human: i hate how their location is remote to get to from scottsdale road

w = 1.0: i also love their convenient location right off of scottsdale road !

w = 2.0: i also not love their convenient location right off of scottsdale road .

w = 3.0: i can not drive to their location though right off of scottsdale road .

w = 4.0: i might not drive to their location right off of scottsdale road .

w = 5.0: i apparently not driving off their purchase location, it was n't short management .

w = 6.0: i hate driving to their location right off of scottsdale road .

---

Source: i actually can not wait to come back next year !

Human: i would not return here next year

w = 1.0: i actually can wait to come back next year !

w = 2.0: i actually not come back next year .

w = 3.0: i actually could n't wait to come back this bad place next year ?

w = 4.0: i actually could n't wait to said wrong service .

w = 5.0: i could n't wait to said this wrong service two minutes ?

w = 6.0: i could n't wait to said this wrong service was no tables .

---

Source: everything is fresh and so delicious !

Human: everything was so stale

w = 1.0: everything is fresh and so salty , but three spot is delicious !

w = 2.0: everything is fresh and so salty , but absolutely \_num\_ smell delicious !

w = 3.0: everything is no and later but only smelled nasty , it was cold !

w = 4.0: service is half but to only later but his smelled bad !

w = 5.0: everything is terrible and no closed toilet

w = 6.0: everything is terrible and smelled nasty !

---

Source: great food recommendations steak and tuna were both great .

Human: the steak and tuna were not up to par

w = 1.0: great food recommendations and steak tuna were both great the lost food .

w = 2.0: food ordered recommendations steak and tuna were both terrible but got more .

w = 3.0: food ordered steak recommendations but tuna were finally flat had bad wrong .

w = 4.0: ordered food steak but were tuna was both ok my bad mine .

|             |                                                                        |
|-------------|------------------------------------------------------------------------|
| $w = 5.0$ : | ordered food were steak but was already tasted disappointed the food . |
| $w = 6.0$ : | but noticed mine were bad and i already left flat poor food .          |
| Source:     | i was nervous and she made me feel so comfortable and welcome .        |
| Human:      | she did not make me feel welcomed                                      |
| $w = 1.0$ : | i was nervous and she made me feel so comfortable and welcome .        |
| $w = 2.0$ : | i was nervous and she made me feel so comfortable and mad .            |
| $w = 3.0$ : | i was nervous and she made me feel so busy .                           |
| $w = 4.0$ : | i was nervous and she is so busy and made me feel mad .                |
| $w = 5.0$ : | i was nervous and she made me feel wrong and so mad .                  |
| $w = 6.0$ : | i was nervous and she made me sad and felt mad .                       |

### 0.3 Multi-aspect Attribute Transfer Cases

|                                                                                                                                                                                                                                                                                                                                                                                                                                                                                                                                         |                                                                                                                                                                                                                                                                                                                                                                                             |
|-----------------------------------------------------------------------------------------------------------------------------------------------------------------------------------------------------------------------------------------------------------------------------------------------------------------------------------------------------------------------------------------------------------------------------------------------------------------------------------------------------------------------------------------|---------------------------------------------------------------------------------------------------------------------------------------------------------------------------------------------------------------------------------------------------------------------------------------------------------------------------------------------------------------------------------------------|
| Source:[0.9, 1.0, 0.9, 0.8, 0.9]                                                                                                                                                                                                                                                                                                                                                                                                                                                                                                        | Target:[0.0, 0.0, 0.0, 0.0, 0.0]                                                                                                                                                                                                                                                                                                                                                            |
| from a can, pours straw gold with thick white head ;<br>aroma is pine and sugar , some citrus but mostly pine<br>. taste is fruity , citrus , tea , slight pine , toast grain.<br>mouthfeel is spot on, carbonation is medium , this<br>brew is quite refreshing ! definitely something i<br>wanna buy in quantity to go camping with this<br>summer !                                                                                                                                                                                  | from a can, pours yellow cloudy lead ; aroma is<br>spicy grassy hop, some citrus but mostly pine<br>. taste is fruity , citrus , tea , slight pine , toast<br>grain. mouthfeel is spot on, carbonation is<br>medium , and unimpressive flavor character !<br>definitely i will never buy in quantity to go<br>camping with this summer !                                                    |
| Source:[0.5, 0.3, 0.7, 0.3, 0.3]                                                                                                                                                                                                                                                                                                                                                                                                                                                                                                        | Target:[1.0, 1.0, 1.0, 1.0, 1.0]                                                                                                                                                                                                                                                                                                                                                            |
| this beer pours a pale straw color . the head is a<br>half an inch in height , and recedes quickly<br>leaving no lacing . the aroma is of nothing. when<br>i try really hard i can detect some extremely faint<br>malt . the taste is little easier to detect that the<br>aroma, but it is still mostly nothing . the mouthfeel<br>is light bodied with nice carbonation . it is actually<br>pretty good for a light lager. overall, this beer tastes<br>too much like water for my likings . i will not be<br>having this beer again . | this beer pours a deep red, glowing, standing out a<br>lot , and recedes quickly . the aroma is of smoked<br>meat , smoked cheese. the taste is little easier to<br>detect that the aroma, but it is still very good . the<br>mouthfeel is light bodied with nice carbonation . it<br>is actually pretty good . overall, this beer tastes like<br>my likings . i will try this beer again . |

### 0.4 Transformer-based Auto-encoder Reconstruction Low Bias

|         |                                                                       |
|---------|-----------------------------------------------------------------------|
| Encode: | ever since joes has changed hands it 's just gotten worse and worse . |
| Decode: | ever since joes has changed hands it 's just gotten worse and worse . |
| Encode: | there is definitely not enough room in that part of the venue .       |
| Decode: | there is definitely not enough room in that part of the venue .       |
| Encode: | she said she 'd be back and disappeared for a few minutes .           |
| Decode: | she said she 'd be back and disappeared for a few minutes .           |
| Encode: | definitely disappointed that i could not use my birthday gift !       |
| Decode: | definitely disappointed that i could not use my birthday gift !       |
| Encode: | the atmosphere was fun and the staff treats you well .                |
| Decode: | the atmosphere was fun and the staff treats you well .                |
| Encode: | their pizza is the best i have ever had as well as their ranch !      |
| Decode: | their pizza is the best i have ever had as well as their ranch !      |
| Encode: | i also love their convenient location right off of scottsdale road .  |
| Decode: | i also love their convenient location right off of scottsdale road .  |

### 0.5 Failure Cases

|                            |
|----------------------------|
| Adding meaningless phrases |
|----------------------------|

|                                 |                                                                    |
|---------------------------------|--------------------------------------------------------------------|
| Source:                         | just left and took it off the bill . (Negative)                    |
| Output:                         | just left and took it off the bill . <b>great fun</b> . (Positive) |
| Attribute-independent data bias |                                                                    |
| Source:                         | everything is fresh and so delicious !                             |
| Output:                         | everything is terrible and <b>no closed toilet</b>                 |
